# Supplementary material
Source: publisher figshare collection journal article supplement (https://acs.figshare.com/ndownloader/files/5773338)
Supplement: Supplementary file 1 [file 5773338]

#	Name:			2-Ni_e2_2_PM3_ESP_MNDO
#	Creating user name:	tom
#	Creation time:		Sun Mar 22 14:42:45 1992

#	Modifying user name:	tom
#	Modification time:	Fri Jul  8 17:28:55 1994

@<TRIPOS>MOLECULE
2-Ni_e2_2_PM3_ESP_MNDO
   46    49     1     7     0
SMALL
USER_CHARGES


@<TRIPOS>ATOM
      1 C1         -2.9283    0.3414   -0.4931 C.ar      1 NO2       -0.1336 
      2 C2         -4.1436   -0.3431   -0.4890 C.ar      1 NO2       -0.2574 
      3 C3         -4.1352   -1.7478   -0.4813 C.ar      1 NO2        0.4540 
      4 C4         -2.9200   -2.4439   -0.4852 C.ar      1 NO2       -0.4984 
      5 C5         -1.7124   -1.7480   -0.4919 C.ar      1 NO2        0.2435 
      6 C6         -0.4465   -2.5426   -0.4743 C.3       1 NO2       -0.1810 
      7 C7          0.7869   -1.7283   -0.8253 C.3       1 NO2       -0.1032 
      8 C8          0.7652   -0.4069   -0.0742 C.3       1 NO2       -0.0496 
      9 C9         -0.4323    0.4363   -0.5585 C.3       1 NO2        0.0662 
     10 C10        -1.7151   -0.3439   -0.4920 C.ar      1 NO2       -0.1736 
     11 C11        -0.5062    1.7575    0.2173 C.3       1 NO2       -0.0878 
     12 C12         0.7914    2.5557    0.1248 C.3       1 NO2       -0.3609 
     13 C13         1.9755    1.7036    0.5840 C.3       1 NO2        0.3181 
     14 C14         2.0172    0.4316   -0.2996 C.3       1 NO2       -0.0256 
     15 C15         3.3912   -0.1651   -0.0106 C.3       1 NO2       -0.2418 
     16 C16         4.3056    1.0558    0.1670 C.3       1 NO2       -0.1312 
     17 C17         3.3834    2.2972    0.2781 C.3       1 NO2        0.1822 
     18 C18         1.8490    1.3866    2.0751 C.3       1 NO2       -0.5008 
     19 O3         -5.3467   -2.3726   -0.4626 O.3       1 NO2       -0.5284 
     20 O17         3.9059    3.1707    1.2516 O.3       1 NO2       -0.6145 
     21 ****       -2.8999    1.4452   -0.4927 H         1 NO2        0.2239 
     22 ****       -2.9105   -3.5419   -0.4830 H         1 NO2        0.2225 
     23 ****       -0.3377   -2.9783    0.5407 H         1 NO2        0.0778 
     24 ****       -0.5360   -3.4048   -1.1652 H         1 NO2        0.0824 
     25 ****        1.7029   -2.2975   -0.5707 H         1 NO2        0.0497 
     26 ****        0.8390   -1.5484   -1.9178 H         1 NO2        0.0587 
     27 ****        0.6572   -0.6089    1.0259 H         1 NO2        0.0953 
     28 ****       -0.2783    0.6779   -1.6430 H         1 NO2        0.0679 
     29 ****       -1.3574    2.3601   -0.1707 H         1 NO2        0.0584 
     30 ****       -0.7505    1.5547    1.2800 H         1 NO2        0.0613 
     31 ****        0.9528    2.9014   -0.9164 H         1 NO2        0.0807 
     32 ****        0.7134    3.4742    0.7391 H         1 NO2        0.1038 
     33 ****        2.0186    0.7478   -1.3760 H         1 NO2        0.0477 
     34 ****        3.3710   -0.7935    0.9001 H         1 NO2        0.0883 
     35 ****        3.7341   -0.8273   -0.8259 H         1 NO2        0.0782 
     36 ****        4.9465    0.9445    1.0624 H         1 NO2        0.0961 
     37 ****        4.9992    1.1660   -0.6858 H         1 NO2        0.0666 
     38 ****        3.3569    2.8560   -0.6888 H         1 NO2        0.0110 
     39 ****        2.7980    1.0233    2.4939 H         1 NO2        0.1377 
     40 ****        1.0961    0.6009    2.2549 H         1 NO2        0.1192 
     41 ****        1.5503    2.2722    2.6516 H         1 NO2        0.1300 
     42 ****       -5.2000   -3.3103   -0.4805 H         1 NO2        0.4229 
     43 ****        3.1902    3.7332    1.5186 H         1 NO2        0.3686 
     44 N          -5.4268    0.4380   -0.4949 N.pl3     1 NO2        0.9045 
     45 O          -5.8484    0.8767    0.5543 O.2       1 NO2       -0.5181 
     46 O          -5.9865    0.6408   -1.5507 O.2       1 NO2       -0.5111 
@<TRIPOS>BOND
     1    2    1 ar   
     2    1   10 ar   
     3    2    3 ar   
     4    3    4 ar   
     5    3   19 1    
     6    4    5 ar   
     7    5    6 1    
     8   10    5 ar   
     9    6    7 1    
    10    7    8 1    
    11    8    9 1    
    12    8   14 1    
    13   10    9 1    
    14    9   11 1    
    15   11   12 1    
    16   12   13 1    
    17   14   13 1    
    18   13   17 1    
    19   13   18 1    
    20   14   15 1    
    21   15   16 1    
    22   17   16 1    
    23   17   20 1    
    24    1   21 1    
    25    2   44 1    
    26    4   22 1    
    27    6   23 1    
    28    6   24 1    
    29    7   25 1    
    30    7   26 1    
    31    8   27 1    
    32    9   28 1    
    33   11   29 1    
    34   11   30 1    
    35   12   31 1    
    36   12   32 1    
    37   14   33 1    
    38   15   34 1    
    39   15   35 1    
    40   16   36 1    
    41   16   37 1    
    42   17   38 1    
    43   18   39 1    
    44   18   40 1    
    45   18   41 1    
    46   19   42 1    
    47   20   43 1    
    48   44   45 2    
    49   44   46 2    
@<TRIPOS>SUBSTRUCTURE
     1 NO2        44 PERM              0 ****  ****    0 ROOT 
@<TRIPOS>ROTATABLE_BOND
    5     4    46  1 1     0  0
   23    22    47  2 1     0  0
@<TRIPOS>ANCHOR_ATOM
3
@<TRIPOS>NORMAL
@<TRIPOS>DATA_FILE
/usr/people/tom/2nitroe2pot.DSP 0 4
@<TRIPOS>CRYSIN
12.055000 19.280001 6.632000 90.000000 90.000000 90.000000 18 1
@<TRIPOS>FF_PBC
FORCE_FIELD_SETUP_FEATURE Force Field Setup information
v1.0  0 0.000000 0.000000 0.000000 0.000000 0.000000 0.000000 NONE 2 0 0 0 0 0 0 0 0 0 0 0 0
